# Supplementary material
Source: MDPI journal article supplement (https://www.mdpi.com/2076-3417/13/23/12959)
Supplement: s1 [file s1]

### *NIES-C medium preparation*

*Haematococcus pluvialis* was cultured using NIES-C medium, comprised of the following (per liter): 0.64 mM  $\text{Ca}(\text{NO}_3)_2$ , 0.99 mM  $\text{KNO}_3$ , 0.23 mM  $\beta$ -glycerophosphoric acid disodium salt pentahydrate, 0.16 mM  $\text{MgSO}_4 \cdot 7\text{H}_2\text{O}$ , 4.13 mM Tris-aminomethane, 0.03  $\mu\text{M}$  thiamine,  $4.09 \times 10^{-4}$   $\mu\text{M}$  biotin, and  $7.38 \times 10^{-5}$   $\mu\text{M}$  vitamin  $\text{B}_{12}$ , along with 3 mL PIV solution. The PIV metal solution consisted of 8.06 mM ethylenediaminetetraacetic acid disodium salt dihydrate, 2.18 mM  $\text{FeCl}_3 \cdot 6\text{H}_2\text{O}$ , 0.55 mM  $\text{MnCl}_2 \cdot 4\text{H}_2\text{O}$ , 0.23 mM  $\text{ZnSO}_4 \cdot 7\text{H}_2\text{O}$ , 0.05 mM  $\text{CoCl}_2 \cdot 6\text{H}_2\text{O}$ , and 0.03 mM  $\text{Na}_2\text{MoO}_4 \cdot 2\text{H}_2\text{O}$ . After adjusting the pH to 7.5, the NIES-C medium was sterilized using a 0.2  $\mu\text{m}$  filter.
