# Supplementary material
Source: MDPI journal article supplement (https://www.mdpi.com/2076-3417/13/23/12959)
Supplement: s1 [file s1]

Archive with 4 entries (4 files):
- Supplementary Figure S1.pdf
- Supplementary File S1.pdf
- Supplementary File S2.pdf
- Supplementary File S3.pdf
