# Supplementary material
Source: MDPI journal article supplement (https://www.mdpi.com/2076-3417/13/23/12959)
Supplement: s1 [file s1 › Supplementary Figure S1.pdf]

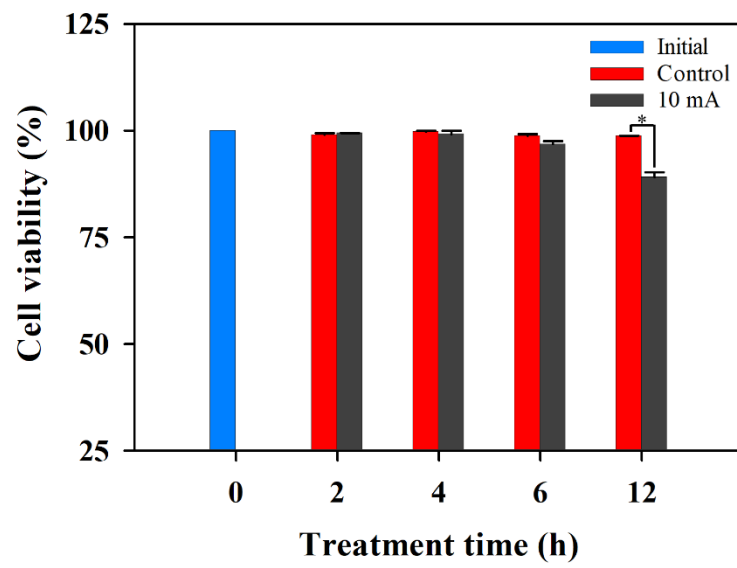

**Figure S1.** Cell viability of *Haematococcus lacustris* after 10 mA electrotreatment over 12 h. The error bars represent the standard deviations of four samples; \*  $p < 0.05$ .
